# Supplementary material
Source: HighWire-hosted journal article supplement (https://qdcxjkg.com/highwire/filestream/112858/field_highwire_adjunct_files/2/Figure_3.pdf)

Fig 3

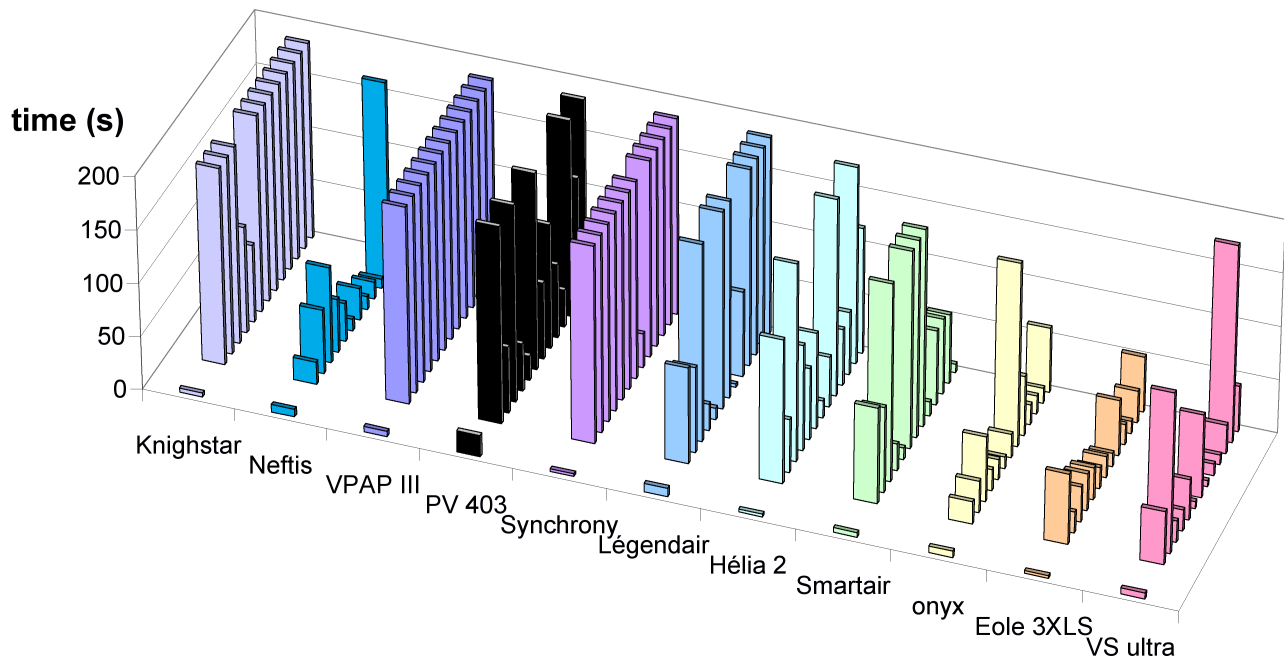

Supplement: Figure_3.pdf [file Figure_3.pdf]
